## Referees for Volume 50

The Editors are pleased to record their thanks to all those listed below who gave of their time and expertise to referee manuscripts submitted for Volume 50 of the *Journal*.

|                        |                       |                      |
|------------------------|-----------------------|----------------------|
| Alheit, J.             | Greig-Smith, P. (2)   | Nævdal, G.           |
| Aneer, G.              | Griffiths, D. K.      | Neilson, J. D.       |
| Arnason, R.            | Gulliksen, B.         | Nellen, W.           |
| Arnold, G. P.          | Hallam, T.            | Nicholson, M. D. (2) |
| Ashford, J. R.         | Hall, S.              | Nordeide, J. T.      |
| Basson, M.             | Harding, T.           | Parsons, T. R.       |
| Beacham, T. D.         | Harris, R.            | Petitgas, P.         |
| Beardmore, J. A.       | Hatfield, E. M. C.    | Prager, M.           |
| Berghahn, R. (2)       | Haug, T. (2)          | Priede, I. G.        |
| Beverton, R. J. H. (3) | Hay, D. E.            | Punt, A.             |
| Birley, A. J.          | Heip, C.              | Radtke, R.           |
| Blindheim, J.          | Herman, A.            | Reddin, D.           |
| Bowering, R.           | Hislop, J. R. G.      | Restrepo, V.         |
| Boyle, P.              | Holliday, F. G. T.    | Ritter, J.           |
| Brander, K.            | Holligan, P. M.       | Rose, G.             |
| Bromley, P. J.         | Hopkins, T. E.        | Rosenberg, M. D.     |
| Campana, S. E. (2)     | Horwood, J. W.        | Saila, S.            |
| Child, A. R.           | Ingle, R. W.          | Schnute, J.          |
| Colebrook, J. M.       | Jacobsen, T.          | Schweigert, J.       |
| Cowey, C. B.           | Jechnells, T.         | Shepherd, J. G.      |
| Crowder, L. B.         | Jones, K.             | Shirley, T.          |
| Cushing, D. H.         | Jørgensen, S. E.      | Sinclair, A.         |
| Danielssen, D. S.      | Kaiser, M.            | Somerton, D. A.      |
| Davenport, J.          | Kirkwood, D.          | Squire, J. L.        |
| Dawson, W. A.          | Kooijman, S. A. L. M. | Staples, D. J.       |
| DeMaster, D.           | Krauss, S. D.         | Stefánsson, G.       |
| Durbin, A. G.          | Laing, I.             | Stewart, P.          |
| Earll, R. L. (2)       | Lassen, H.            | Sullivan, P.         |
| Esterby, S.            | Lilly, G. R.          | Tanasichuk, R.       |
| Falk-Petersen, I. B.   | Love, R. M.           | Thomas, M. L. H.     |
| Fives, J. M.           | MacCall, A. D.        | Thompson, P.         |
| Fryer, R. B.           | MacLennan, D. N.      | Turrell, W.          |
| Gage, J. D.            | Magnusson, J. V.      | Unwin, T.            |
| Gagnon, P.             | Mann, K.              | van Halliday, P.     |
| Garrod, D. J.          | Marcotte, D.          | Ward, R. D.          |
| Gauvin, J.             | Mauchline, J.         | Warren, W.           |
| Gibson, R. N. (3)      | Meadows, P. S.        | Warwick, R. M.       |
| Gordon, J. D.          | Mendelssohn, R.       | Westernhagen, H. v.  |
| Gould, W. J.           | Mills, D. H.          | Wooster, W.          |
| Grainger, R.           | Mohn, R. (2)          | Wootton, R. J.       |
